# Supplementary material for: A Rapid Magnetic Solid Phase Extraction Method Followed by Liquid Chromatography-Tandem Mass Spectrometry Analysis for the Determination of Mycotoxins in Cereals
Source: MDPI journal article supplement (doi:10.3390/toxins9040147), 2017-04-21
Supplement: s1 [file s1]

# Supplementary Materials: A Rapid Magnetic Solid Phase Extraction Method Followed By Liquid Chromatography-Tandem Mass Spectrometry Analysis for the Determination of Mycotoxins in Cereals

Giorgia La Barbera, Anna Laura Capriotti, Chiara Cavaliere, Patrizia Foglia, Carmela Maria Montone, Riccardo Zenezini Chiozzi and Aldo Laganà

**Table S1.** *Zea mays* meal and *Triticum durum* flour composition according to Italian Research Center for Food and Nutrition ([http://nut.entecra.it/646/tabelle\\_di\\_composizione\\_degli\\_alimenti.html](http://nut.entecra.it/646/tabelle_di_composizione_degli_alimenti.html)).

| Chemical composition<br>(g/100 g) | <i>Zea mays</i> | <i>Triticum durum</i> |
|-----------------------------------|-----------------|-----------------------|
| Water                             | 12.5            | 12.5                  |
| Proteins                          | 8.7             | 12.9                  |
| Lipids                            | 2.7             | 2.8                   |
| Available carbohydrates           | 80.8            | 63.2                  |
| Starch                            | 72.1            | 54.5                  |
| Soluble sugars                    | 1.5             | 3.2                   |

**Table S2.** Recovery (RE, %), Matrix Effect (ME, %) and Process Efficiency (PE, %, i.e. RE×ME) obtained using 50 mg of magnetic GCB and different corn meal amounts. See equations 1-3 in the manuscript for their calculation. Samples were spiked with 5 ng g<sup>-1</sup> of the four AFs and OTA and 250 ng g<sup>-1</sup> of ZEN, then extracted as described in the Experimental section. Results are an average of three experimental replicates.

| Analyte | 1000 mg corn meal |     |    | 500 mg corn meal |    |    | 250 mg corn meal |     |    |
|---------|-------------------|-----|----|------------------|----|----|------------------|-----|----|
|         | RE                | ME  | PE | RE               | ME | PE | RE               | ME  | PE |
| AFG2    | 45                | 87  | 39 | 66               | 79 | 52 | 62               | 91  | 56 |
| AFG1    | 52                | 82  | 43 | 69               | 77 | 53 | 74               | 72  | 53 |
| AFB2    | 59                | 82  | 48 | 74               | 79 | 58 | 73               | 81  | 59 |
| AFB1    | 56                | 92  | 52 | 71               | 86 | 61 | 73               | 71  | 52 |
| OTA     | 79                | 29  | 23 | 79               | 28 | 22 | 87               | 70  | 61 |
| ZEN     | 64                | 105 | 67 | 75               | 98 | 74 | 76               | 117 | 89 |

**Table S3.** Matrix Effect (ME, %) obtained by analyzing 0.25 g maize flour sample spiked after extraction at ML, i.e.,  $1 \mu\text{g kg}^{-1}$  for each AF,  $3 \mu\text{g kg}^{-1}$  for OTA and  $750 \mu\text{g kg}^{-1}$  for ZEN, and a standard solution containing the same nominal mycotoxin concentration. The same solution were analyzed using two different C18 chromatographic columns: I) a Hypersil Gold C18 column ( $50 \times 2.1 \text{ mm i.d.}$ ,  $1.9 \mu\text{m}$  particle size); II) and a Cortecs UPLC C18+ column ( $100 \text{ mm} \times 2.1 \text{ mm i.d.}$ ,  $1.6 \mu\text{m}$  particle size). Results are an average of two technical replicates.

| Analyte | Column I | Column II |
|---------|----------|-----------|
|         | ME       | ME        |
| AFG2    | 78       | 93        |
| AFG1    | 72       | 84        |
| AFB2    | 75       | 72        |
| AFB1    | 76       | 77        |
| OTA     | 52       | 72        |
| ZEN     | 117      | 118       |

**Table S4.** Equations and coefficient of determination ( $R^2$ ) relative to standard and matrix-matched calibration curves. Matrix-matched calibration solutions were prepared by spiking either corn meal and durum wheat flour samples before extraction and following the experimental procedure. The three ISs were also added in constant amount in all the solutions.

| Analyte | Standard calibration ( $R^2$ ) | Corn meal matrix-matched calibration ( $R^2$ ) | Durum wheat flour matrix-matched calibration ( $R^2$ ) |
|---------|--------------------------------|------------------------------------------------|--------------------------------------------------------|
| AFG2    | $y=63309x+1575.2$ (0.9999)     | $y=31525x+2595.3$ (0.9988)                     | $y=52928x-3695$ (0.9979)                               |
| AFG1    | $y=107106x+190.76$ (0.9998)    | $y=47273x+1714.5$ (0.9981)                     | $y=64419x-5372$ (0.9994)                               |
| AFB2    | $y=217290x+403.79$ (0.9997)    | $y=137769x-771.69$ (0.9998)                    | $y=199913x-18956$ (0.9979)                             |
| AFB1    | $y=151127x+396.28$ (0.9996)    | $y=79617x+2426.9$ (0.9989)                     | $y=107350x-9890.8$ (0.9994)                            |
| OTA     | $y=25883x-88597$ (0.9911)      | $y=36269x-1348.5$ (0.9998)                     | $y=46954x-11043$ (0.9992)                              |
| ZEN     | $y=285.45x-507.28$ (0.9991)    | $y=0.0057x-127.18$ (0.9968)                    | $y=88.94x-917.2$ (0.9976)                              |

**Table S5.** Results on ten corn meal sample survey.

|      | Samples ( $\mu\text{g kg}^{-1}$ ) |       |       |       |       |       |       |       |       |       |
|------|-----------------------------------|-------|-------|-------|-------|-------|-------|-------|-------|-------|
|      | C1                                | C2    | C3    | C4    | C5    | C6    | C7    | C8    | C9    | C10   |
| AFG2 | <MLOD                             | <MLOD | <MLOD | <MLOD | <MLOD | <MLOD | <MLOD | <MLOD | <MLOD | <MLOD |
| AFG1 | <MLOD                             | <MLOD | <MLOD | <MLOD | <MLOD | <MLOD | <MLOD | <MLOD | <MLOD | <MLOD |
| AFB2 | <MLOD                             | <MLOD | <MLOD | <MLOD | <MLOD | <MLOD | <MLOD | <MLOD | <MLOD | <MLOD |
| AFB1 | <MLOD                             | <MLOD | <MLOD | <MLOD | <MLOD | <MLOD | <MLOD | <MLOD | <MLOD | <MLOD |
| OTA  | <MLOD                             | <MLOD | <MLOQ | 1.3   | <MLOD | <MLOD | <MLOQ | <MLOD | <MLOD | <MLOD |
| ZEN  | <MLOQ                             | <MLOQ | 72.9  | <MLOQ | <MLOQ | <MLOD | <MLOQ | <MLOQ | <MLOQ | <MLOQ |

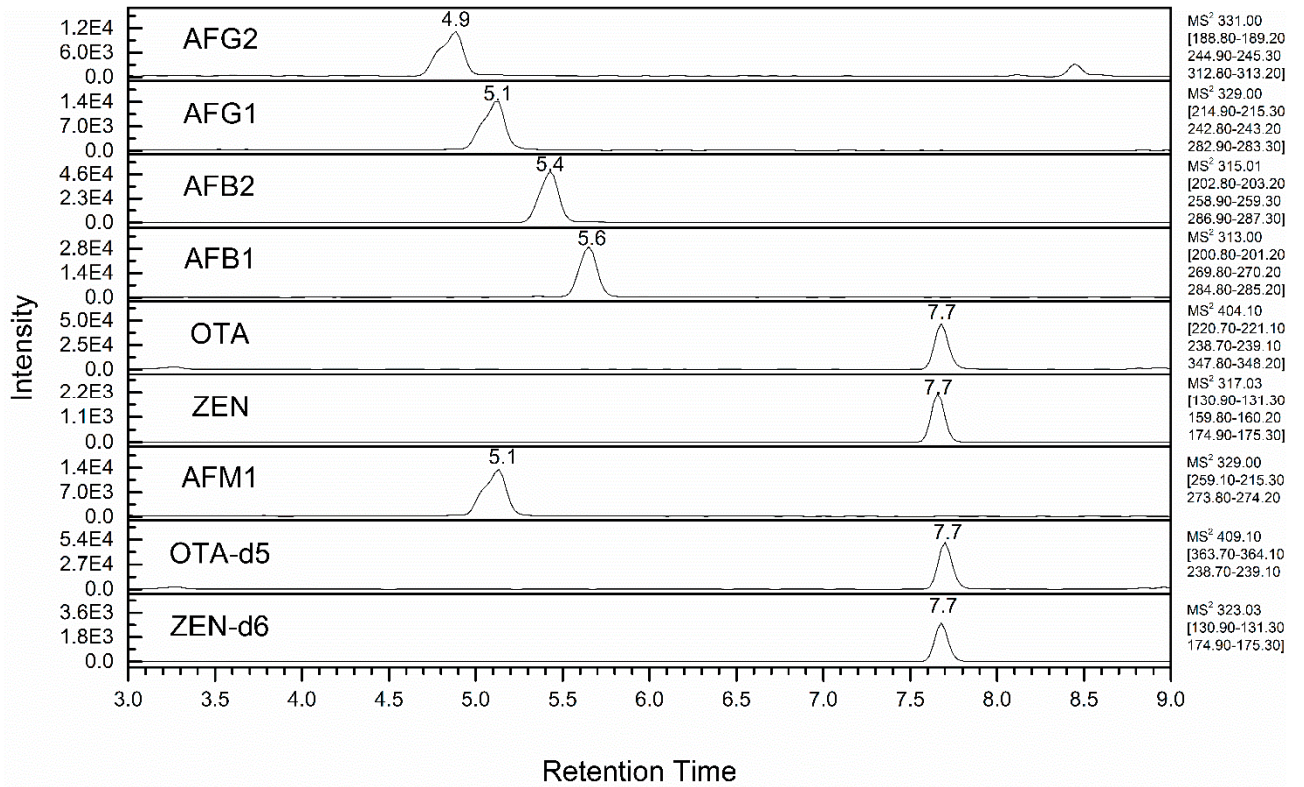

**Figure S1.** Extracted ion chromatograms (sum of three transition pairs for each analyte) of a wheat flour sample spiked with the analytes at 0.5×ML.
